# Supplementary material for: Control of replication initiation by the Sum1/Rfm1/Hst1 histone deacetylase
Source: Springer Nature journal article supplement (doi:10.1186/1471-2199-9-100), 2008-01-01

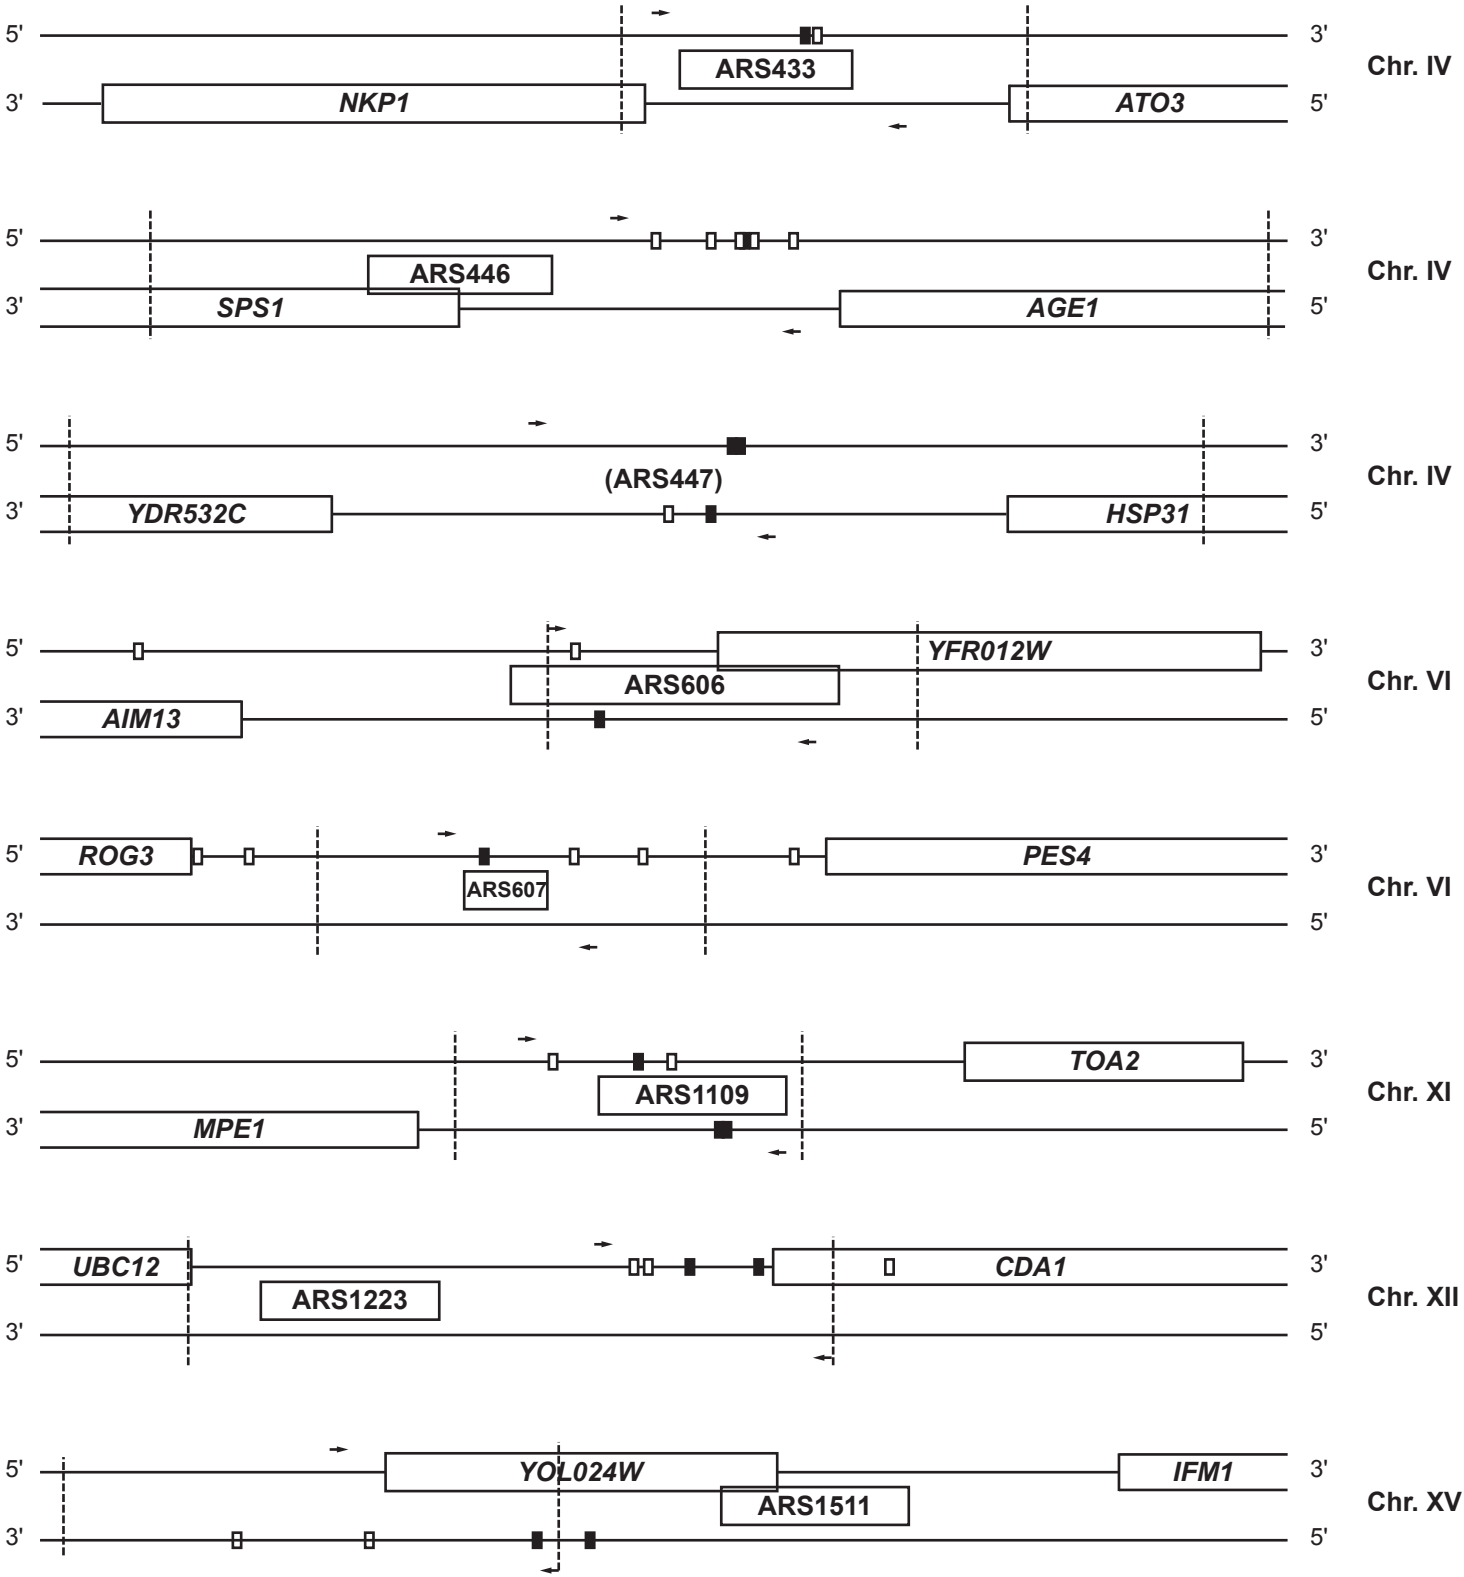

Supplement: Additional file 1 [file 1471-2199-9-100-s1.pdf]
